# Supplementary material
Source: publisher figshare collection journal article supplement (https://acs.figshare.com/ndownloader/files/11500367)
Supplement: Supplementary file 1 [file 11500367]

## Supporting Information

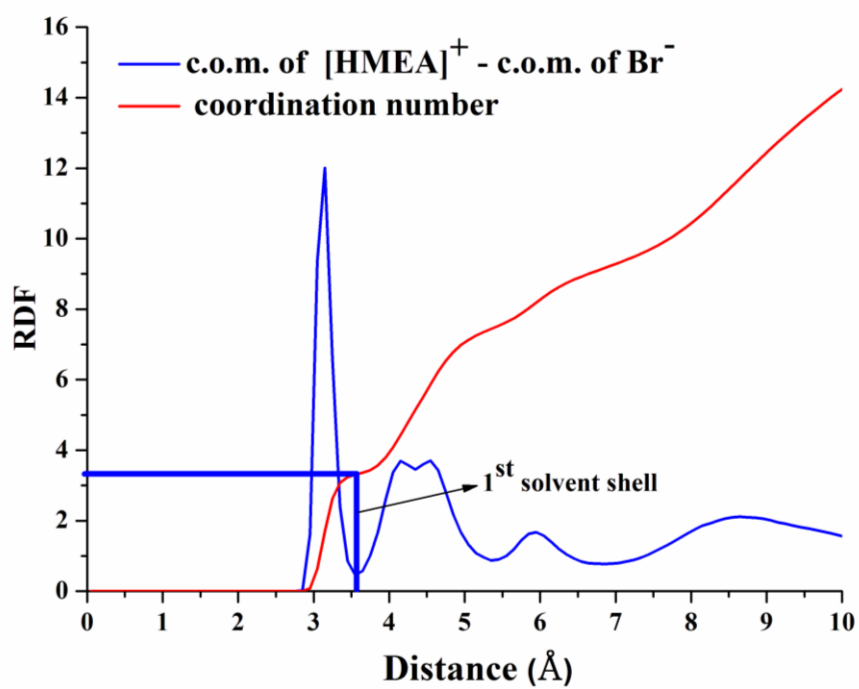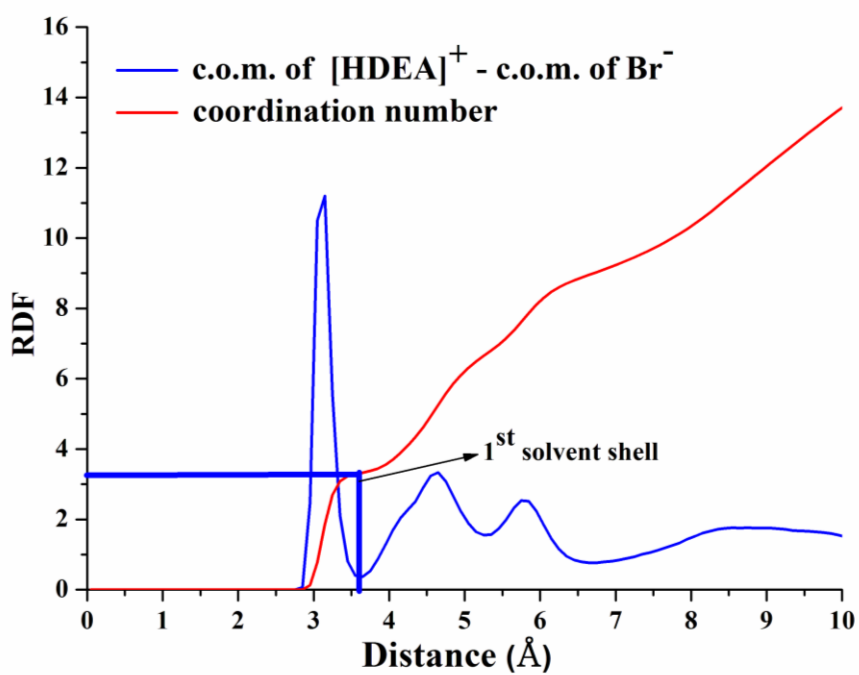

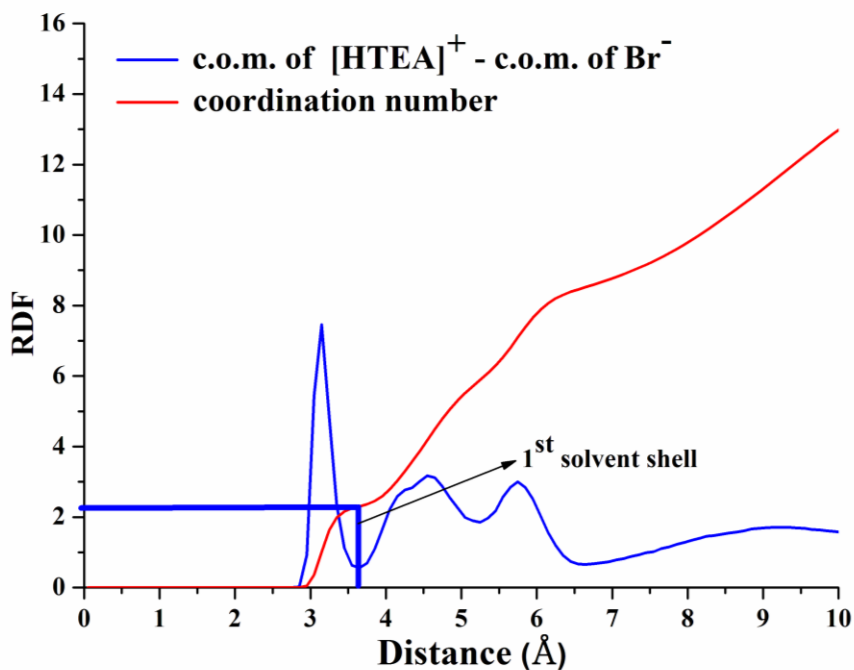

**Figure S1.** Radial distribution functions (blue line) and integrated coordination numbers (red line) with respect to the center of mass (c.o.m.) of [HMEA]<sup>+</sup>, [HDEA]<sup>+</sup>, and [HTEA]<sup>+</sup> cation and the center of mass (c.o.m.) of Br<sup>-</sup> anion. The first solvent shell is at a distance of around 3.6 Å, and all the coordination numbers are less than 4.

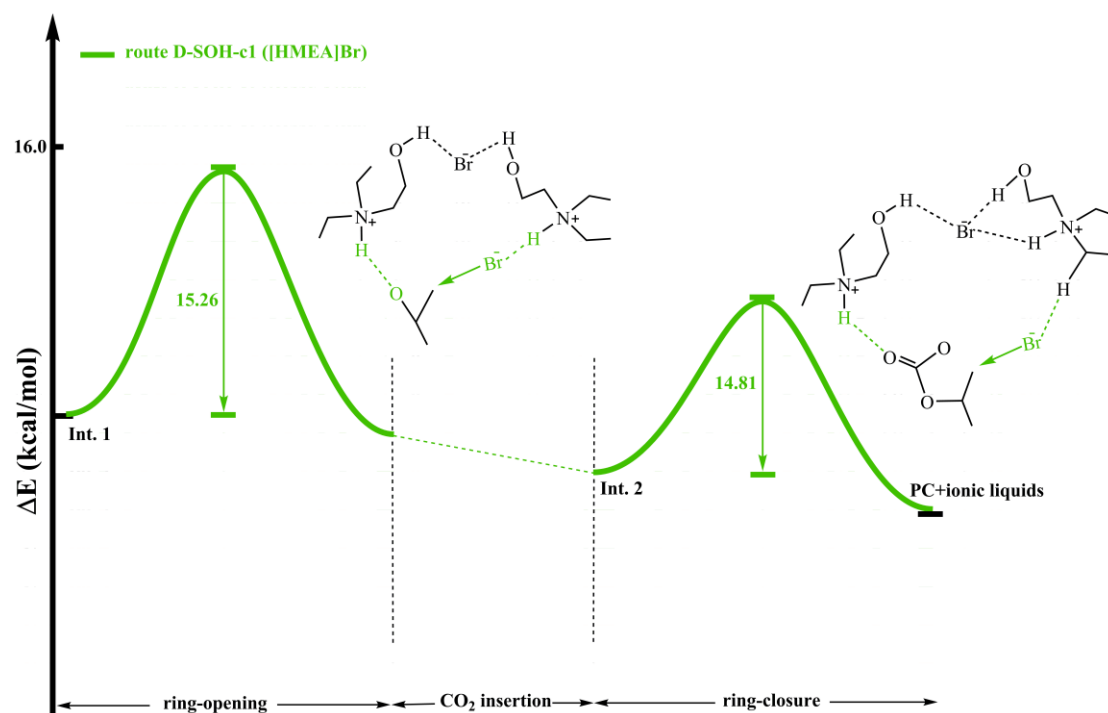

**Figure S2.** Potential energy profile and sketch structures of transition states for the ring-opening step and ring-closure step along route D-SOH-c1 calculated at the M06/6-311+G(2d,2p) (PCM)//B3PW91/6-31G(d,p) level. Int. 1 and Int. 2 represent the corresponding intermediates.

**Table S1.** The corresponding schematic structures of transition states and barrier heights catalyzed by [HMEA]Br at the M06/6-311+G(2d,2p) (PCM)//B3PW91/6-31G(d,p) level.

| routes        | schematic structures of transition states                                           | barrier heights<br>(kcal/mol) |
|---------------|-------------------------------------------------------------------------------------|-------------------------------|
| route S-SOH-1 | 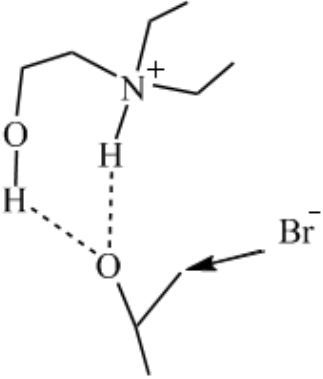   | 30.36                         |
| route S-SOH-2 |   | 21.53                         |
| route S-SOH-3 |  | 25.41                         |

**Table S2.** The corresponding schematic structures of transition states and barrier heights catalyzed by [HDEA]Br at the M06/6-311+G(2d,2p) (PCM)//B3PW91/6-31G(d,p) level.

| routes        | schematic structures of transition states                                           | barrier heights<br>(kcal/mol) |
|---------------|-------------------------------------------------------------------------------------|-------------------------------|
| route S-DOH-1 | 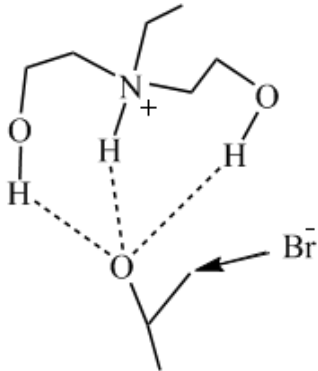   | 29.32                         |
| route S-DOH-2 |  | 20.58                         |
| route S-DOH-3 |  | —                             |

route S-DOH-4

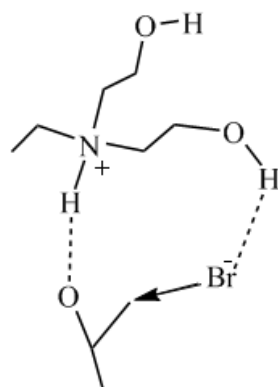

22.19

route S-DOH-5

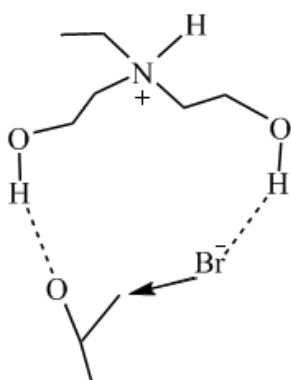

21.85

route S-DOH-6

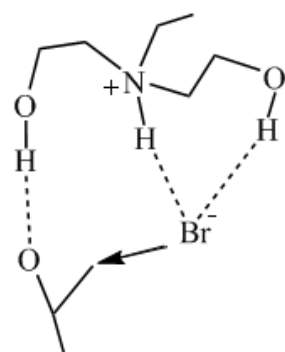

27.00

route S-DOH-7

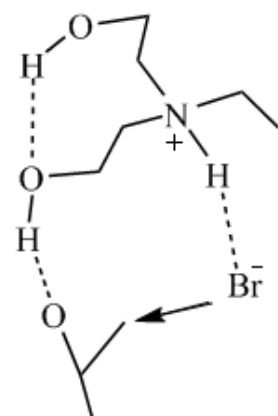

28.56

**Table S3.** The corresponding schematic structures of transition states and barrier heights catalyzed by [HTEA]Br at the M06/6-311+G(2d,2p) (PCM)/B3PW91/6-31G(d,p) level.

| routes        | schematic structures of transition states                                           | barrier heights<br>(kcal/mol) |
|---------------|-------------------------------------------------------------------------------------|-------------------------------|
| route S-TOH-1 | 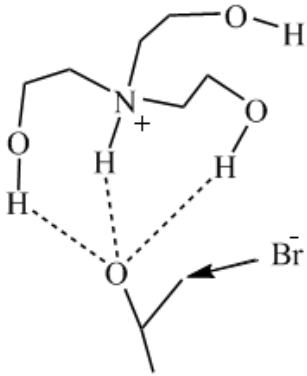   | 30.50                         |
| route S-TOH-2 |   | 24.21                         |
| route S-TOH-3 |  | 21.73                         |

route S-TOH-4

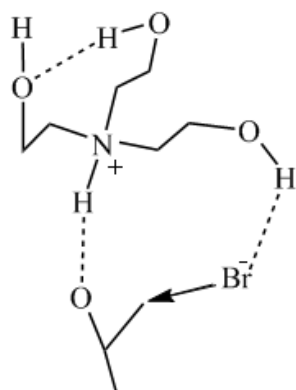

22.49

route S-TOH-5

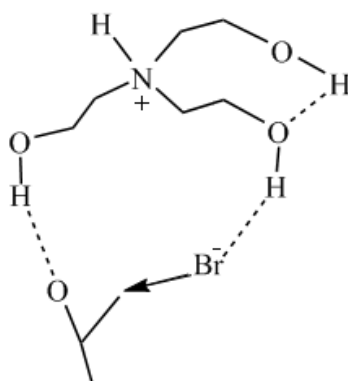

20.74

route S-TOH-6

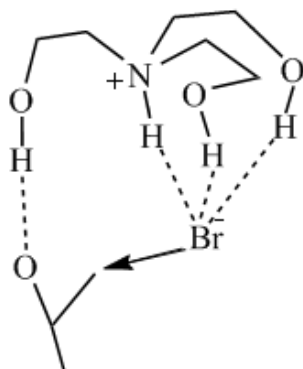

28.56

route S-TOH-7

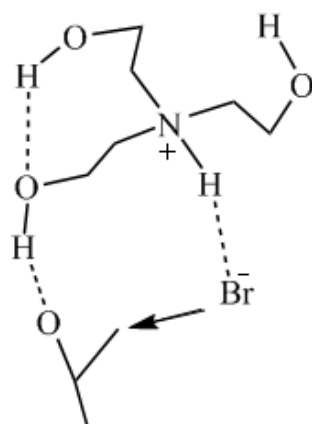

28.91



**Table S4.** The corresponding schematic structures of transition states and barrier heights catalyzed by two [HMEA]Br at the M06/6-311+G(2d,2p) (PCM)//B3PW91/6-31G(d,p) level.

| routes         | schematic structures of transition states                                           | barrier heights<br>(kcal/mol) |
|----------------|-------------------------------------------------------------------------------------|-------------------------------|
| route D-SOH-a1 | 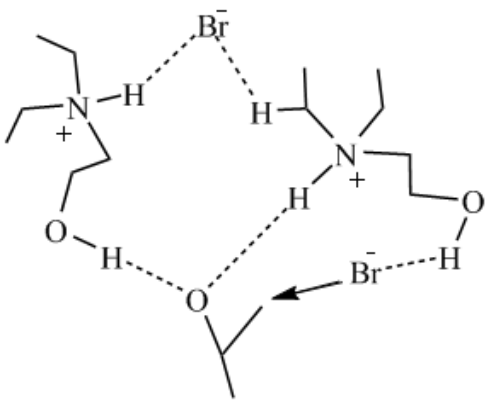  | 21.80                         |
| route D-SOH-a2 |  | 17.98                         |
| route D-SOH-b1 |  | 29.19                         |

route D-SOH-b2

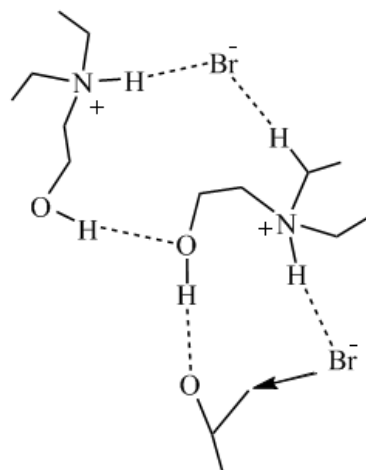

24.43

route D-SOH-b3

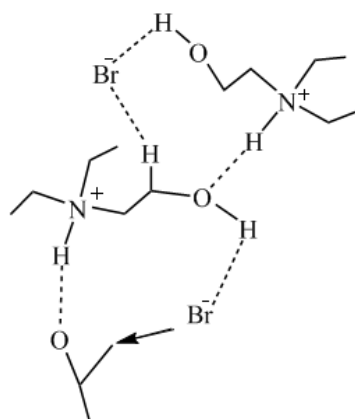

19.98

route D-SOH-b4

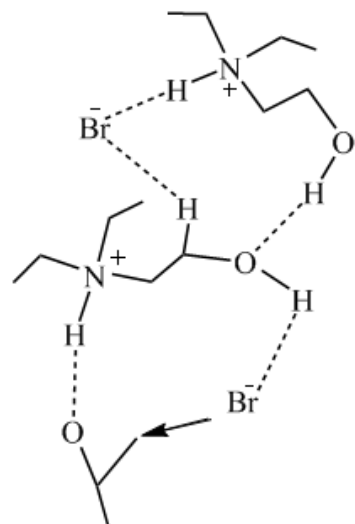

24.22

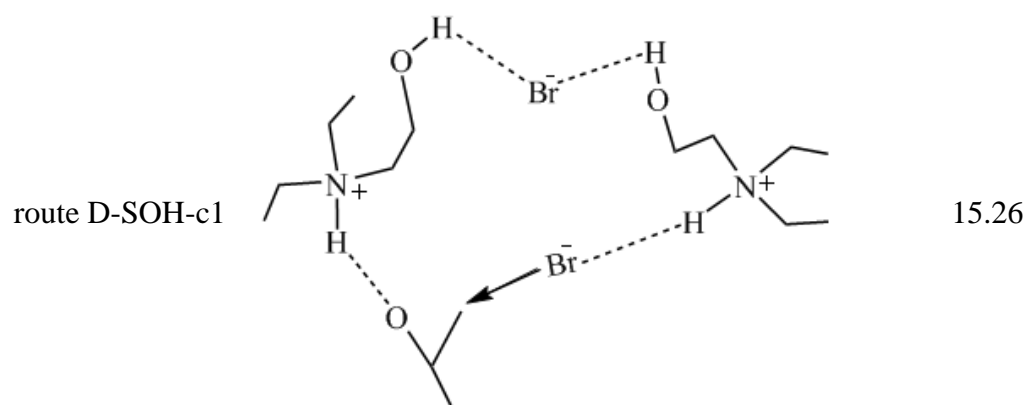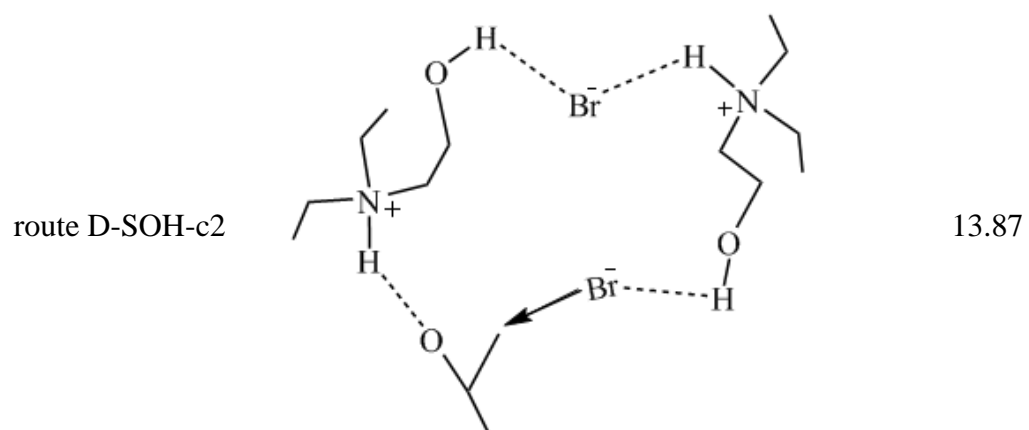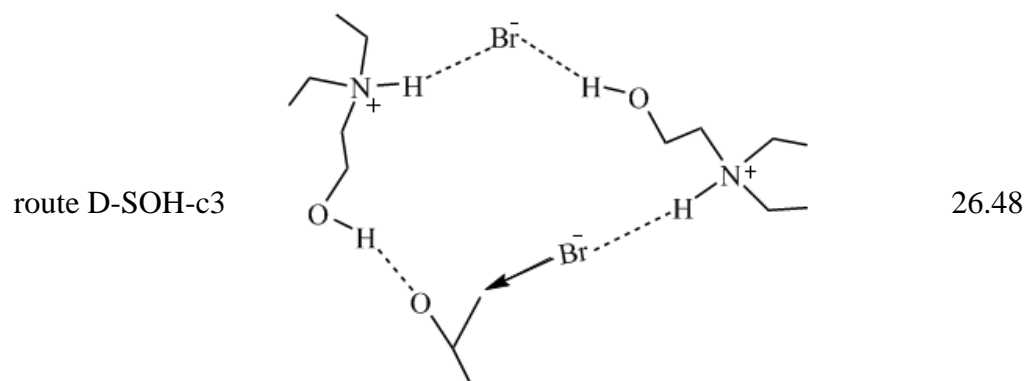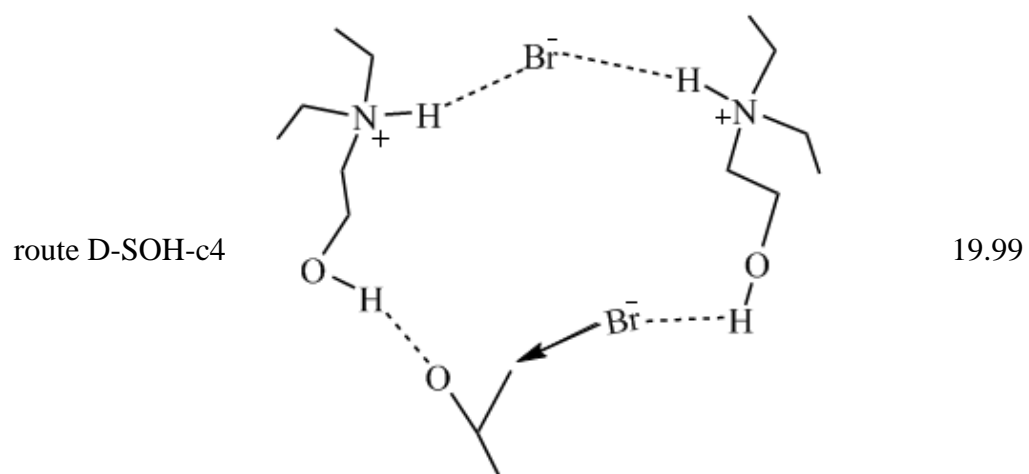

**Table S5.** The corresponding schematic structures of transition states and barrier heights catalyzed by two [HDEA]Br (two [HTEA]Br) following the similar mechanism of route D-SOH-c2 at the M06/6-311+G(2d,2p) (PCM)//B3PW91/6-31G(d,p) level.

| routes         | schematic structures of transition states                                            | barrier heights<br>(kcal/mol) |
|----------------|--------------------------------------------------------------------------------------|-------------------------------|
| route D-DOH-c2 | 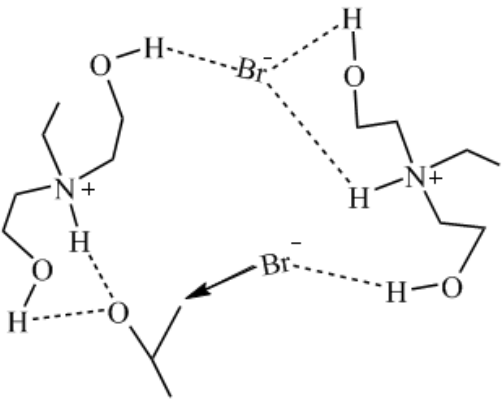  | 12.51                         |
| route D-TOH-c2 |  | 20.41                         |
